# Supplementary material for: Interventions to improve the rate or timing of initiation of antiretroviral therapy for HIV in sub-Saharan Africa: meta-analyses of effectiveness
Source: PubMed Central journal article supplement (PMC4978859; doi:10.7448/ias.19.1.20888), 2016-08-08

### Additional file 1. Search Strategy for Each Bibliographic Database

| Database              | Search                                                                                                                                                                                                                                                                                                                                             |
|-----------------------|----------------------------------------------------------------------------------------------------------------------------------------------------------------------------------------------------------------------------------------------------------------------------------------------------------------------------------------------------|
| PubMed                | ((linkage OR pre-ART OR initiation OR retention OR attrition OR "loss to follow up") AND ((HIV OR "antiretroviral therapy")) AND ((efficacy OR evaluation OR intervention OR trial))) AND (("2008/01/01"[PDat] : "2016/12/31"[PDat]) AND Humans[Mesh] AND English[lang])                                                                           |
| ISI Web of Knowledge  | (TS=((HIV OR "antiretroviral therapy")) AND TS=((linkage OR pre-ART OR initiation OR retention OR attrition OR "loss to follow up")) AND TS=((efficacy OR evaluation OR intervention OR trial))) AND LANGUAGE: (English) AND DOCUMENT TYPES: (Article OR Proceedings Paper) Indexes=SCI-EXPANDED, SSCI, A&HCI, CPCI-S, CPCI-SSH Timespan=2008-2015 |
| EMBASE                | 'hiv'/exp or hiv or 'antiretroviral therapy' and (linkage or 'pre art' or initiation or retention or attrition or 'loss to follow up') and (efficacy or 'evaluation'/exp or evaluation or intervention or trial) and [english]/lim and [abstracts]/lim and [2008-2015]/py and [embase]/lim and [humans]/lim                                        |
| LILACS Portal         | (HIV OR antiretroviral) AND (linkage OR pre-ART OR initiation OR retention OR attrition OR adherence OR compliance) AND (efficacy OR evaluation OR intervention OR trial) AND (db:("LILACS"))                                                                                                                                                      |
| Global Index Medicus  | (HIV) AND (linkage OR retention)                                                                                                                                                                                                                                                                                                                   |
| African Index Medicus | (HIV) AND (linkage OR retention)                                                                                                                                                                                                                                                                                                                   |

## Additional file 2. Forest plots of each intervention, relative weights and corresponding I<sup>2</sup> values

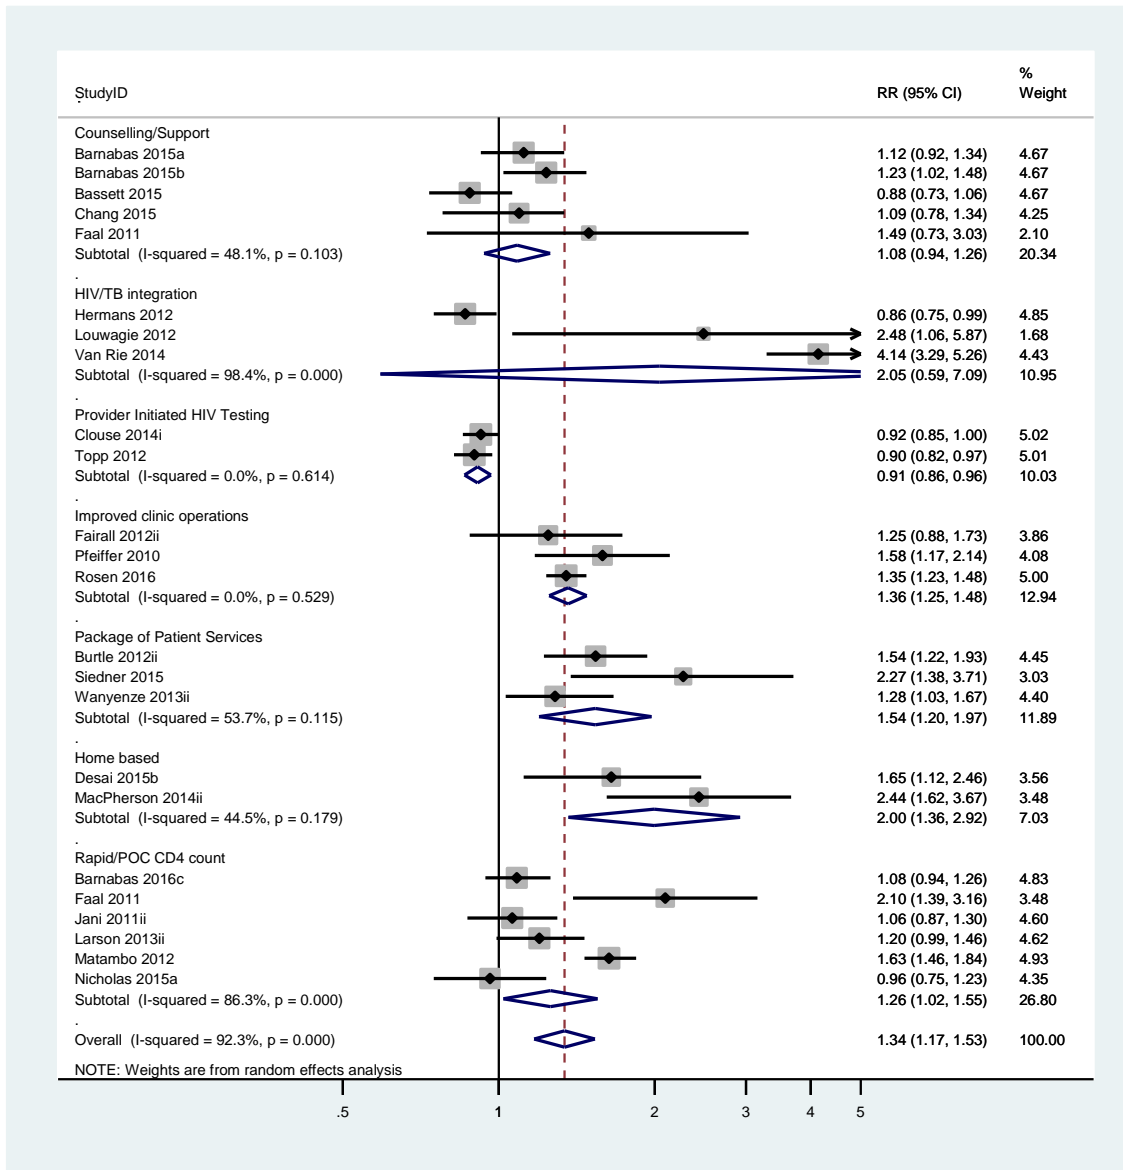

Supplement: JIAS-19-20888-s001.pdf [file JIAS-19-20888-s001.pdf]
